# Supplementary material for: Wafer-Scale LSPR Substrate: Oblique Deposition of Gold on a Patterned Sapphire Substrate
Source: MDPI journal article supplement (doi:10.3390/bios12030158), 2022-03-03
Supplement: s1 [file s1]

Supplementary Materials

# Wafer-Scale LSPR Substrate: Oblique Deposition of Gold on a Patterned Sapphire Substrate

Kihyeun Kim <sup>1,†</sup>, Ki Joong Lee <sup>2,†</sup>, Na Rae Jo <sup>2</sup>, Eun-Jung Jo <sup>3</sup>, Yong-Beom Shin <sup>2,4,\*</sup> and Min-Gon Kim <sup>3,\*</sup>

<sup>1</sup> Center for Systems Biology, Massachusetts General Hospital, Boston, MA 02114, USA; kkim50@mgh.harvard.edu

<sup>2</sup> Bionanotechnology Research Center, Korea Research Institute of Bioscience and Biotechnology (KRIBB), 125 Gwahak-ro, Yuseong-gu, Daejeon 34141, Korea; kijoong123@kribb.re.kr (K.J.L.); nalgamgi@kimm.re.kr (N.R.J.)

<sup>3</sup> Department of Chemistry, Gwangju Institute of Science and Technology (GIST), Gwangju 61005, Korea; jej@gist.ac.kr

<sup>4</sup> BioNano Health Guard Research Center, 125 Gwahak-ro, Yuseong-gu, Daejeon 34141, Korea

\* Correspondence: ybshin@kribb.re.kr (Y.-B.S.); mkim@gist.ac.kr (M.-G.K.)

† These authors contributed equally to this work.

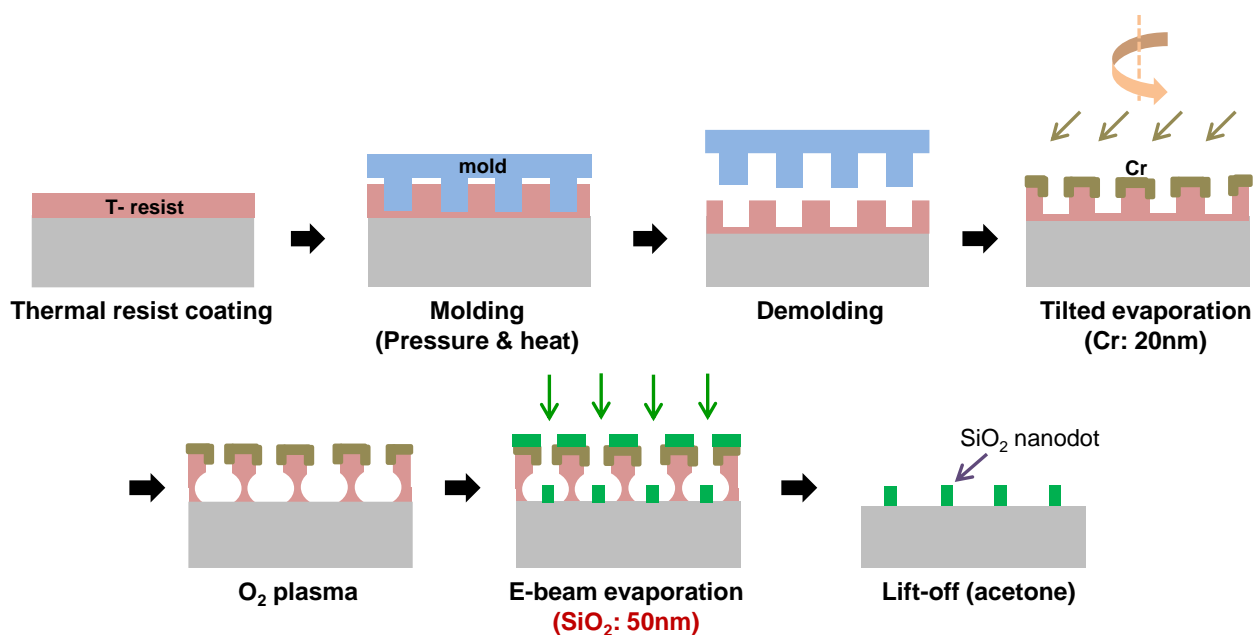

**Figure S1.** Schematic of the formation of a SiO<sub>2</sub> nanodot array on a sapphire wafer using nanoimprint lithography.

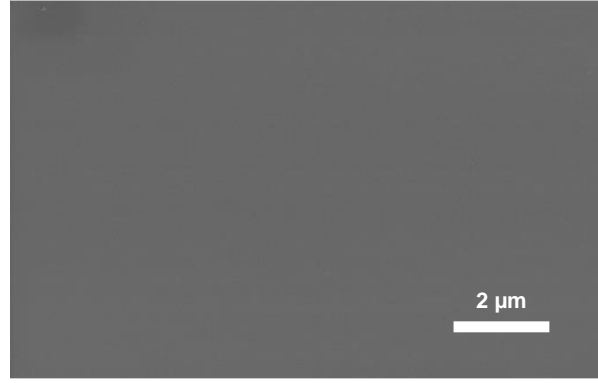

**Figure S2.** SEM image of the SiO<sub>2</sub> nanodot (not annealed)-patterned sapphire wafer after the wet etch. This image indicates that SiO<sub>2</sub> nanodots were etched by H<sub>2</sub>SO<sub>4</sub> and H<sub>3</sub>PO<sub>4</sub>, which was not able to act as hard masks.

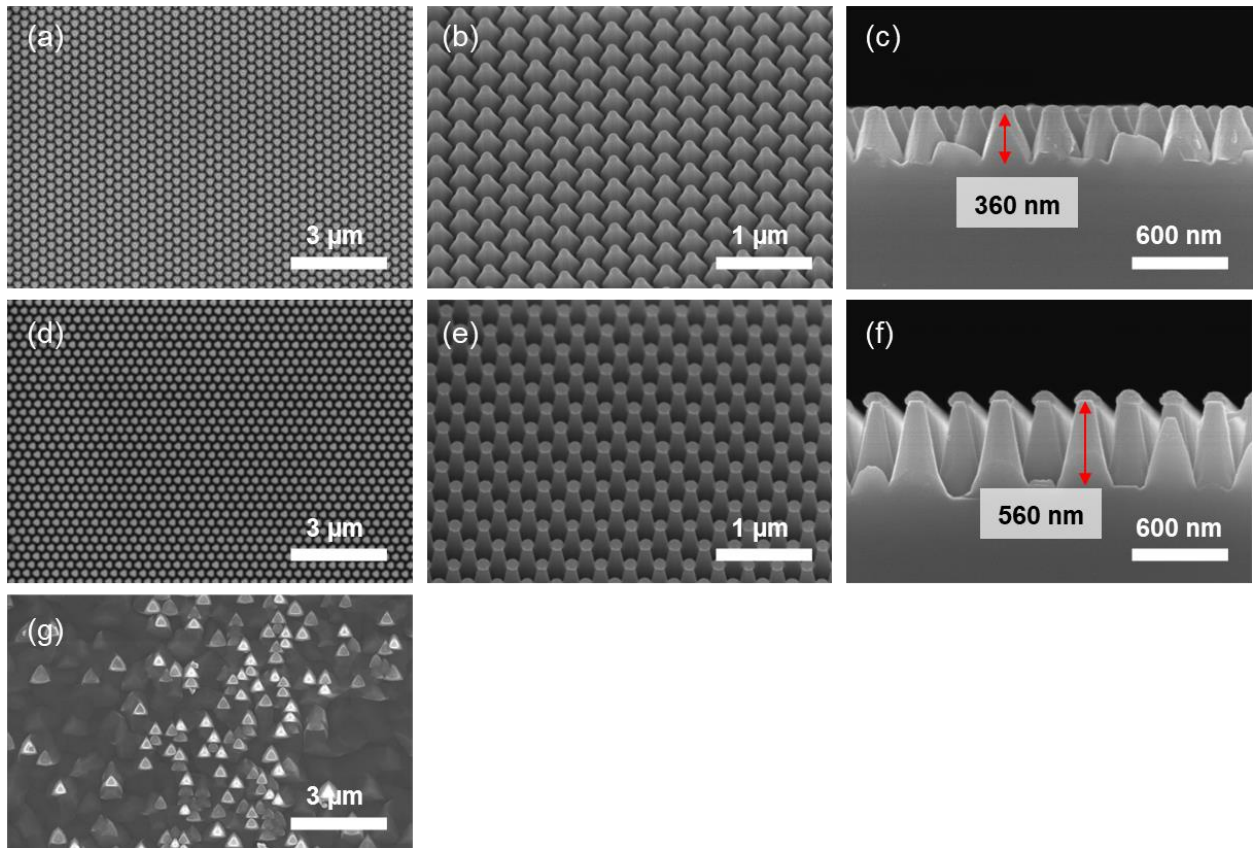

**Figure S3.** SEM images of a PSS (wet etch solution: H<sub>2</sub>SO<sub>4</sub>:H<sub>3</sub>PO<sub>4</sub> = 3:1 (v/v)): etch temperature: (a-c) 310°C, (d-f) 330°C, and (g) 350°C. (a),(d),(g) Top, (b),(e) 45° tilted, and (c),(f) side views.

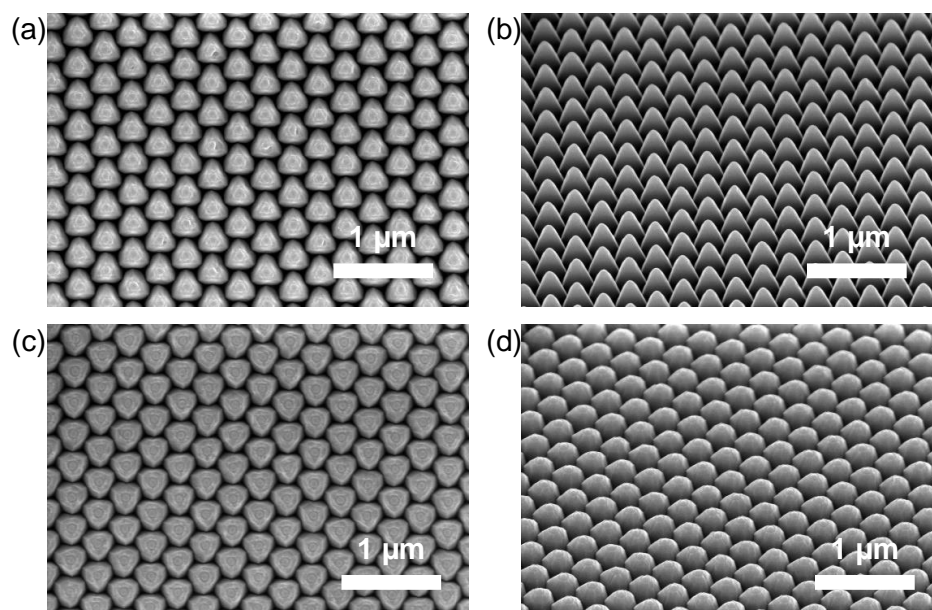

**Figure S4.** SEM images after the second wet etch of PSS. Before the second wet etch, SiO<sub>2</sub> hard masks were eliminated using a buffered oxide etch solution. Conditions for the second wet etches were (a), (b) H<sub>2</sub>SO<sub>4</sub>:H<sub>3</sub>PO<sub>4</sub> = 1:1 and (c), (d) H<sub>2</sub>SO<sub>4</sub>:H<sub>3</sub>PO<sub>4</sub> = 1:3, at 310°C and 40 min for both. ((a) and (c): top views, (b) and (d): 45° tilted views).

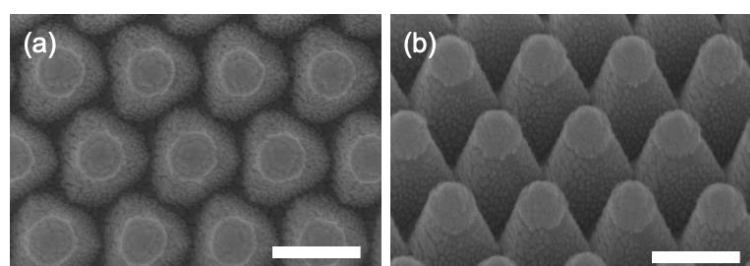

**Figure S5.** SEM images after vertical deposition of Au onto a PSS ((a): top view, (b): 45° tilted view). Scale bars in the images are 300 nm.

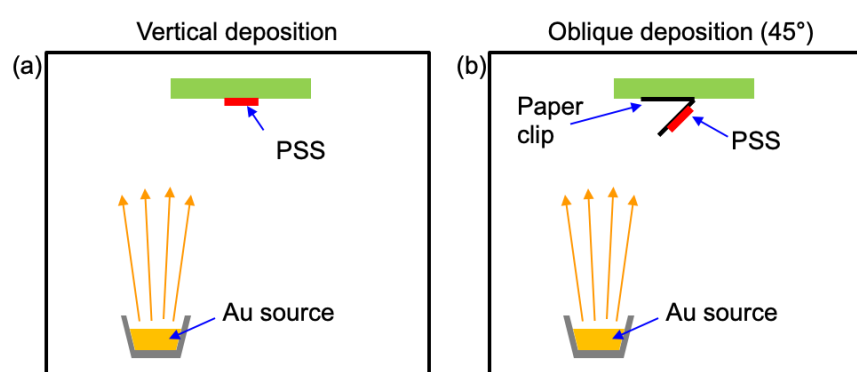

**Figure S6.** Schematic illustration of (a) vertical deposition and (b) oblique deposition of Au on PSS.

**Figure S7.** Absorbance and SEM images of Au/PSS where Au was deposited at the angle of (a) 0°, (b) 30°, (c) 45°, and (d) 60° (Note that (i), (ii), and (iii) indicate absorbance data, top-view SEM images, and tilted-view, 45°, SEM images, respectively.).

**Table S1.** LSPR-shift observation of obliquely deposited Au on PSS when exposed to biomolecules.

| Adding sequence | 1           | 2   | 3          | 4   |
|-----------------|-------------|-----|------------|-----|
| Added molecule  | Biotin-HPDP | STA | Biotin-BSA | STA |

---

|                    |     |     |     |     |
|--------------------|-----|-----|-----|-----|
| LSPR peak (nm)     | 782 | 784 | 786 | 788 |
| Shift ( $\Delta$ ) | -   | +2  | +2  | +2  |
